# Supplementary material
Source: Springer Nature journal article supplement (https://www.springermedizin.de/resource/supplementary/12958_2007_405_MOESM1_ESM.pdf/9567812)

**CHORIODECIDUA**

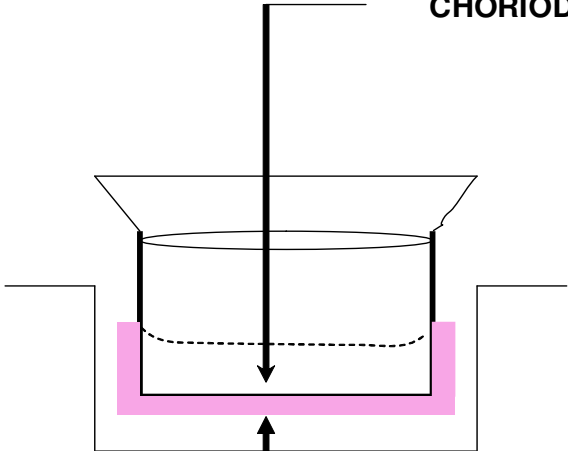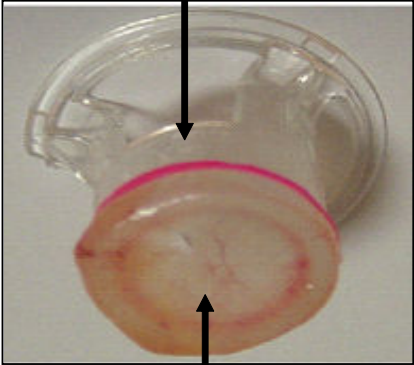

**AMNION**

Supplement: MOESM1 [file 9567812]
